CORRECTION

# Correction: Stage-specific IFN-induced and IFN gene expression reveal convergence of type I and type II IFN and highlight their role in both acute and chronic stage of pathogenic SIV infection

Nadia Echebli, Nicolas Tchitchek, Stéphanie Dupuy, Timothée Bruel, Caroline Passaes, Nathalie Bosquet, Roger Le Grand, Christine Bourgeois, Benoit Favier, Rémi Cheynier, Olivier Lambotte, Bruno Vaslin

The fifth author's name is spelled incorrectly. The correct name is Caroline Passaes. The correct citation is: Echebli N, Tchitchek N, Dupuy S, Bruel T, Passaes C, Bosquet N, et al. (2018) Stage-specific IFN-induced and IFN gene expression reveal convergence of type I and type II IFN and highlight their role in both acute and chronic stage of pathogenic SIV infection. PLoS ONE 13(1): e0190334. <https://doi.org/10.1371/journal.pone.0190334>

## Reference

1. Echebli N, Tchitchek N, Dupuy S, Bruel T, Peireira Bittencourt Passaes CP, Bosquet N, et al. (2018) Stage-specific IFN-induced and IFN gene expression reveal convergence of type I and type II IFN and highlight their role in both acute and chronic stage of pathogenic SIV infection. PLoS ONE 13(1): e0190334. <https://doi.org/10.1371/journal.pone.0190334> PMID: 29324751

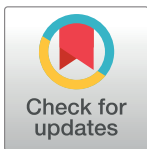

## OPEN ACCESS

**Citation:** Echebli N, Tchitchek N, Dupuy S, Bruel T, Passaes C, Bosquet N, et al. (2018) Correction: Stage-specific IFN-induced and IFN gene expression reveal convergence of type I and type II IFN and highlight their role in both acute and chronic stage of pathogenic SIV infection. PLoS ONE 13(2): e0193629. <https://doi.org/10.1371/journal.pone.0193629>

**Published:** February 23, 2018

**Copyright:** © 2018 Echebli et al. This is an open access article distributed under the terms of the [Creative Commons Attribution License](https://creativecommons.org/licenses/by/4.0/), which permits unrestricted use, distribution, and reproduction in any medium, provided the original author and source are credited.
